# Supplementary material
Source: PubMed Central journal article supplement (PMC1472500)
Supplement: pnas_0601037103_2.pdf [file pnas_0601037103_2.pdf]

```

901 G A G G T A T C T G A A A G C C A C T T C A A G T A C C C A A T T G T G G A G C A G T A C T T G A A G A C A A A G A A A MRS1
15 - - - - - T G A A A R C C A C T T C A A G T A C C C A A T T G T G G A G C A G T A C T T G A A G A C A A A G A A A rev.compl
9 - - - - - T G A A A R C C A C T T C A A G T A C C C A A T T G T G G R G C A G T A Y T T G A S G A C K K - G M C M forw.

961 A A T T C T A A T A A T T T A A T C A T C A A G T A C A T T A G C T G C C G C C T G C T G A C A C T C A T C A T T A T A
67 A A T T Y T A A T A A T T T A A T C A T C A A G T A C A T T A G C T G C C G C C T G C T G A C A C T C A T C A T T A T A
34 A A T T C T A W T A W T T T A W T C W T C A A G T W C W T T A G C T G C C G C C T G C T G A M R C T C A T C A T T A T A

1021 C T G T T A G C G T G T A T C T A C C T G G G C T A T T A C T T C A G C C T C T C C T C A C T C T C A G A C G A G T T T
127 C T G T T A G C G T G T A T C T A C S T G G G S T A T T A C T T C A G C C T Y T C C T C A C T C T C A G A C G A G T T T
94 C T G T T A G S G T G T A T C T A C C T G G G C T A T T A C T T C A S C C T C T C C T C A C T C T C A R A C R A G T T T

1081 G T G T G C A G C A T C A A A T C A G G G A T C C T G A G A A A C G A C A G C A C C G T G C C C G A T C A G T T T C A G
187 G T G T G C A G C A T C A A A T C A G G G A T C C T G A G A A A M G A C A G C A C C G T G C C C G A T C A G T T T C A G
154 G T G T G C A G C A T C A A A T C A G G G A T C C T G A R A A A C G A C A G C M C C G T G C C C R A T C A K T T T C A G

1141 T G C A A A C T C A T T G C C G T G G G C A T C T T C C A G T T G C T C A G T G T C A T T A A C C T T G T G G T T T A T
247 T G C A A A C T C A T T G C C G T G G G C A T Y T T C C A G T T G C T C A G T G T C A T T A A C C T T G T G G T T T A T
214 T G C A A A C T C W T T A G C C G K G T T C T C C A G T T A C K T T A C K T G K S G W G T T T A T

1201 G T C C T G C T G G C T C C C G T G G T T G T C T A C A C G C T G T T T G T T C C A T T C C G A C A G A A G A C A G A T
307 G T C C T G C T G G C T C C C G T G G T T G T Y T A C A C G C T G T T T G T T C C A T T C C G A C A G A A G A C A G A T
274 G T C C T G C T G G C T C C C G K G G T T G T C T A C M C G C T G T T T G T T C C A T T C C R A C A R A A R A M A R A T

1261 G T T C T C A A A G T G T A C G A A A T C C T C C C C A C T T T T G A T G T T C T G C A T T T C A A A T C T G A A G G G
367 G T T C T C A A A G S S T A M G A A A T C C T C C C C A C T T T T G A T G T T C T G C A T T T C A A A T Y T G A A G G G
334 G T T C T C A A A G T G T A C R A A A T C C T C C C C A C T T T T G A T G T T C T G C A T T T M A A A T C T G A A G G G

1321 T A C A A C G A T T T G A G C C T C T A C A A T C T C T T C T T G G A G G A A A A T A T A A G T G A G G T C A A G T C A
427 T A C W R C G A W T T G A G C C T C Y A C A A T C T C T T C T - G G A G G R A A A T A T A R R W G A G G K C A A G T C A
394 T A C A A C R A T T T G A G C C T C T A C A A T C T C T T C T T G R A G R A A A A T A T A A G T G A G G T C A A G T C A

1381 T A C A A G T G T C T T A A G G T A C T G G A G A A T A T T A A G A G C A G T G G T C A G G G G A T C G A C C C A A T G
486 Y A C A A G K - - - - - - - - - - - - - - - - - - - - - - - - - - - - - - - - - - - - - - - - - - - - - - - -
454 T A C A A G T G T C T T A A G G T A C T G R A R A A T A T W A A R A - - - - - - - - - - - - - - - - - - - - - -

```
