# Supplementary material
Source: PubMed Central journal article supplement (PMC1472500)

AB4515

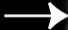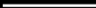

0.2 mm

Supplement: pnas_0601037103_1.pdf [file pnas_0601037103_1.pdf]

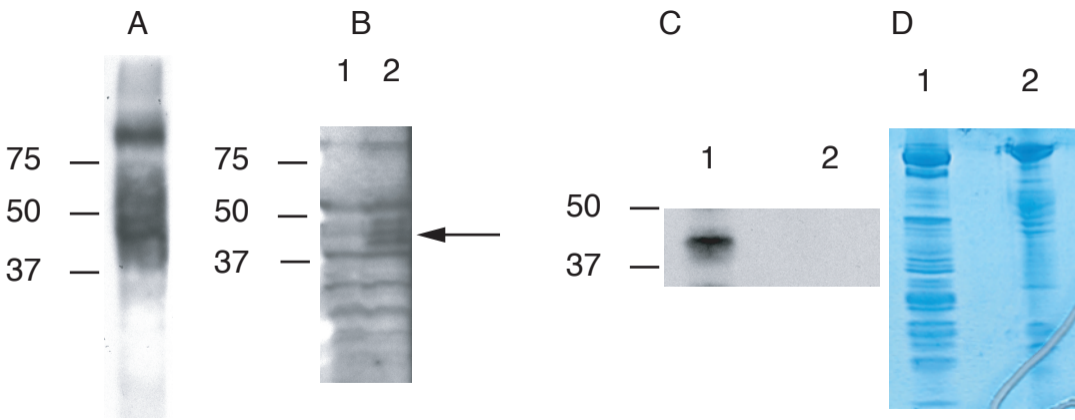

Supplement: pnas_0601037103_3.pdf [file pnas_0601037103_3.pdf]

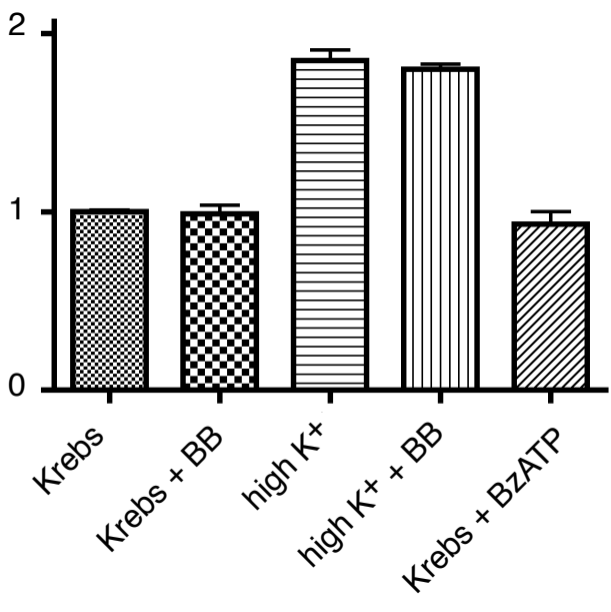

Supplement: pnas_0601037103_5.pdf [file pnas_0601037103_5.pdf]

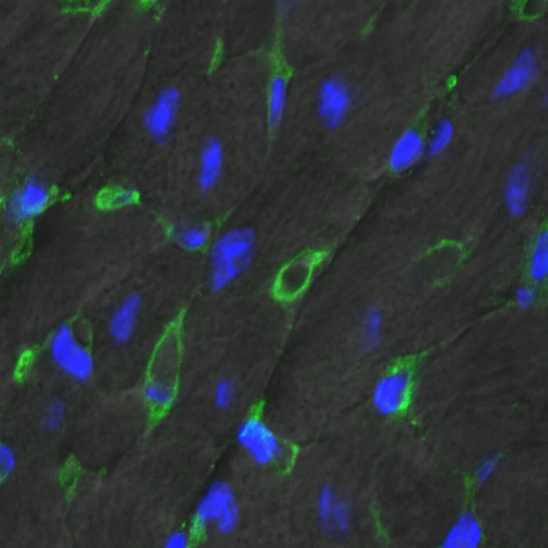

Supplement: pnas_0601037103_6.pdf [file pnas_0601037103_6.pdf]
